# Supplementary material for: Barriers to, and Facilitators of, Exercising in Fitness Centres among Adults with and without Physical Disabilities: A Scoping Review
Source: Int J Environ Res Public Health. 2021 Jul 9;18(14):7341. doi: 10.3390/ijerph18147341 (PMC8304633; doi:10.3390/ijerph18147341)
Supplement: Supplementary file 1 [file ijerph-18-07341-s001.zip › Sup2 _excelsheet.xlsx]

## Sheet: Ark1
Number	Author(s)	Year	Titel	Origin	Type of publication		Methodology/Methods	Aim	Population	Context	Concept - fitness center participation, barriers and facilitators (5 from Di Blasi + 1 ekstra)												Key finding or comments
				Were the study was conducted	Research (qual, quan, mixed ect.)	Grey (newspaper article, report, poster ect.)				Type of indoor fitness center	1. The setting - the specific fitness centre: e.g. building, arrangement and fitness machines		2. Fitness user characteristics: e.g. physical disability and other “personal factors”		3. Fitness instructor’s/staff characteristics: e.g. knowledge/education and communication skills		4. Fitness centre user – instructor/manager relationship: e.g. the personal chemistry, teaching, prejudices		5. Fitness characteristics: e.g. type of training, planning, specific exercises etc.		6. Other relations: e.g. To other fitness center users or disabled carer
											Barriers	Facilitators	Barriers	Facilitators	Barriers	Facilitators	Barriers	Facilitators	Barriers	Facilitators	Barriers	Facilitators
